1 **A health systems analysis of non-compliance to the maternity referral system by**  
2 **health facilities in Uganda: Findings from a mixed-methods study**

3

4

5

6

7 **Authors:**

8 *Henry Zakumumpa<sup>1\*</sup>, Caroline Kyozira<sup>2</sup>, Martin Bulamu<sup>2</sup>, Remmy Buhuguru<sup>3</sup>*

9

10 \*Correspondence to: Henry Zakumumpa (Email: [zakumumpa.henry09@gmail.com](mailto:zakumumpa.henry09@gmail.com), Tel:+256772520519)

11

12 **Affiliations:**

13 <sup>1</sup>Makerere University, School of Public Health, Kampala, Uganda

14

15 <sup>2</sup> Republic of Uganda Ministry of Health, Division of Health Information Management, Kampala, Uganda

16

17 <sup>3</sup> Baylor College of Medicine, Children's Foundation, Kampala, Uganda

18

19

20

21

22

23

24

25

26

27

28

29

30

31

## 32 **ABSTRACT**

### 33 **Introduction**

34 A fully functional referral system is central to achieving quality maternal and newborn care. In 2018,  
35 Uganda established Kawempe National Referral hospital (KRNH) as the highest level of care for  
36 maternity services. There is a dearth of data examining if the referral function for which it was  
37 established has been met. The objectives of this study were two fold; i) to assess the appropriateness of  
38 in-coming referrals at KRNH ii) to examine factors underpinning referral decisions at lower referring  
39 facilities across Uganda.

### 40 **Methods**

41 This was a two-phased, mixed-methods study involving 76 health facilities across Uganda. In Phase One,  
42 we conducted a cross-sectional study examining incoming referrals at KNRH between July 2019 and  
43 August 2020 based on routinely collected data in the Health Information System (HMIS) in-patient  
44 registers. In Phase Two, we qualitatively explored factors underpinning maternity referrals at 75  
45 purposively selected facilities. Descriptive statistics were managed in STATA (v14) while qualitative data  
46 were analyzed by thematic approach.

### 47 **Results**

48 A total of 461,226 referrals were made to KNRH during the period under review. The three most  
49 common indications for referral at KNRH were; previous caesarian scar, premature rupture of  
50 membranes and obstructed labour. Facilities mandated to offer comprehensive emergency obstetric  
51 care such as general hospitals (84%) and sub-district hospitals or Health Centre IVs (18%) were the two  
52 leading sources of referrals at KNRH. Shortage of basic commodities, poorly equipped theatres,  
53 deficiencies in skills for labour, study leaves for maternity workforce at lower facilities contributed to  
54 unnecessary referrals.

### 55 **Conclusion**

56 Several of the indications of referrals at KNRH are ideally manageable at lower referring facilities such as  
57 district and sub-district hospitals levels suggesting deficiencies in the national obstetric referral system.

58 Interventions for strengthening basic clinical skills in the management of labour at lower referring  
59 facilities and addressing underpinning health system constraints is recommended.

60

61

62

63

64

65

66

67

68

69

70

71

72

73

74

75

76

77

78

79

80

81 **BACKGROUND**

82 Reducing maternal mortality is a global health priority [1], [2]. sub-Saharan Africa (SSA) has the highest  
83 maternal mortality rate in the world [3]. Estimates of the maternal mortality ratio (MMR) for SSA, as a  
84 region, have been as high as 600 per 100,000 live births [4]. The Sustainable Development Goals (SDGs)  
85 have set targets for reducing maternal mortality in SSA and the rest of the globe [1], [2].

86 Health system constraints such as low skilled birth attendance and the stock outs of commodities have  
87 been identified as influential on maternal health outcomes in SSA [5]. However, cultural and socio-  
88 economic factors also play a role [6]. More direct causes of maternal mortality include hemorrhage,  
89 unsafe abortion, hypertensive disorders in pregnancy, obstructed labour and sepsis [7]. Emergency  
90 obstetric care(EmOC) is a priority intervention for reducing maternal mortality [8]. Emergency obstetric  
91 care refers to care given in the event of complications during and after labour that pose a threat to the  
92 life of the mother or child [8]. Within the suite of interventions under EmOC, referrals for more  
93 advanced care for mothers in labour is a central tenet underpinning the quality of maternity care  
94 provided [9]. Referrals are important in that they allow for advanced specialist handling of complications  
95 of females in labour before they pose a danger to the life of the mother and the unborn child [10]. The  
96 WHO recognizes functional referral systems as a key indicator of the quality of maternal care [11]  
97 **(Figure 1).**

98 In SSA, several countries such as Ethiopia have set up specialized referral hospitals for EmOC [12].  
99 Although, there is an accumulating evidence base on understanding maternal care services at the  
100 primary-care level of service delivery in SSA [13]- [15], there is a paucity of evidence on the uptake of  
101 maternity services at newly established specialized national referral hospitals [16]. These data are  
102 important in understanding trends in health seeking for obstetric health care and the underpinning

103 health system constraints. This is critical for health services planning and in devising appropriate  
104 interventions for achieving targets for reducing maternal mortality in SSA [1], [2].

105 Uganda has a maternal mortality ratio of 343 out of 100,000 live births [17], [18]. An estimated 2% of  
106 women in Uganda die due to maternal causes [17], [18].

107 In 2018, Uganda established the Kawempe National Referral Hospital (KNRH) as a specialized national  
108 centre of excellence in maternal and newborn care services. The hospital was intended to handle  
109 referrals from lower-level facilities that require more advanced and specialized care [19]. The Ugandan  
110 health system has a hierarchical referral system (**Figure 2**) where primary care level facilities (such as  
111 sub-county health centre IIIs) are expected to provide basic EmOC while sub-district and district  
112 hospitals are expected to offer comprehensive EmOC while more advanced cases are referred to the  
113 tertiary level of care and ultimately to the national referral hospital along an apex cascade chain [8].

114 Although Kawempe National Referral hospital has been in operation since 2018, there is a dearth of  
115 research reporting trends in the uptake of lifesaving services at KNRH, the portfolio of patients it serves  
116 since its inception and, if the referral function for which it was established is being met. The objectives  
117 of this study were two fold; i) to assess the appropriateness of in-coming referrals at KNRH ii) to  
118 examine factors underpinning referral decisions at lower-level referring facilities across Uganda.

119

## 120 **MATERIAL AND METHODS**

### 121 **Study design**

122 This was a mixed-methods sequential explanatory research design [18]. The study was conducted in two  
123 phases, implemented sequentially [18]. In Phase One were conducted a cross sectional study of

124 incoming obstetric referrals at Kawempe National Referral Hospital in Uganda between 1<sup>st</sup> July 2019 and  
125 31<sup>st</sup> August 2020. In Phase two, we qualitatively explored factors underpinning referral decision-making  
126 at 75 lower referring facilities across Uganda.

## 127 **Study sites**

### 128 *Phase One*

129 Kawempe National Referral Hospital (KNRH) is located in one the administrative units of the Ugandan  
130 capital city of Kampala in central Uganda. The hospital was established in 2018 as a specialized national  
131 referral hospital for maternity care. KNRH is the highest level in the maternity referral chain in Uganda.  
132 With over 32,000 births per year, the hospital is also the largest and busiest specialized maternity care  
133 facility in Uganda with 80-100 deliveries per day [20].

### 134 *Phase Two*

135 We purposively sampled at total of 15 facilities with the highest number of referrals at KNRH to  
136 qualitatively explore factors underpinning the high number of referrals. We selected five facilities from  
137 each of three levels of care in the Ugandan health system (**Figure 2**); at the level of i) General hospitals,  
138 ii) sub-district facilities (Health Centre IV) and iii) sub-county health facilities (Health Centre IIIs). For  
139 regional representation, we selected five facilities from each of four geographic regions of Uganda  
140 (Northern, Western, Eastern and Southern). In each of the four regions, we selected; a) one general  
141 hospital (including two private ones) b) two Health centre IVs c) three Health centre IIIs. We aimed for  
142 an in-depth exploration of factors influencing referral decision-making at lower referring facilities  
143 outside of central Uganda (which contributes the highest number of referrals).

144

145 **Data collection**

146 *Phase One*

147 Data were collected between 1st July 2019 and 31st August 2020 at Kawempe National Referral Hospital  
148 (KNRH).

149 Data were also extracted from three principal sources; a) from routinely collected maternity services  
150 records from the Health Information System (HMIS) In-patient Registers, b) anonymized patient- level  
151 delivery data were extracted from maternity registers maintained at the hospital and c) from the District  
152 Health Information System (DHIS2). Due to a decentralized filing system where each department keeps  
153 its own, largely manual system, data were extracted from a number of primary records from individual  
154 units at KNRH. We included all females referred with pregnancy-related complications while pregnant  
155 (antenatal complications needing urgent delivery), during labour or within immediate post- partum.

156 Table 1 shows the list of records reviewed for this study.

157 Table 1: Primary records from which data were extracted.

| No. | Record                               |
|-----|--------------------------------------|
| 1   | Maternity Register                   |
| 2   | Gynecology Inpatient Register        |
| 3   | High Dependency Unit (HDU) Register  |
| 4   | Severe Pre-Eclampsia (SPET) Register |
| 5   | Theatre Register                     |
| 6   | Document delivery book               |
| 7   | Labour suite ward                    |
| 8   | Special care Unit register           |

158

159 From the described registers, we extracted; i) Unique patient identifiers, ii) Date of admission, iii) Age of  
160 client, iv) Reason for referral and v) Referring facility.

161 *Phase Two*

162 We conducted semi-structured interviews (SSIs) with facility in-charges of the selected health facilities  
163 to explore the health system context(s) underpinning referral decision-making themed around the  
164 WHO's six building blocks of the health system (supplies and medicines, human resources for health,  
165 financing, governance, service delivery and health information systems). A pre-tested interview guide  
166 was used constructed around the six 'building blocks' of a health system. Interviews were conducted by  
167 the first author with the support of four research assistants experienced in health services research. On  
168 average the interviews lasted between 45 to 60 minutes. Face-to-face interviews were conducted in  
169 participants' offices at the 75 purposively selected facilities between June and September 2021.

170 **Ethical clearance**

171 This research received ethical approval from Mildmay Uganda Research Ethics Committee (MUREC)  
172 under instrument: REC REF 0712–2020. MUREC is accredited by the Uganda National Council of Science  
173 and Technology (UNCST). All participants provided oral consent form before participating in the study  
174 which was witnessed by their facility in-charges. All patient data from Kawempe National Referral  
175 Hospital were fully anonymized before being accessed by the investigators.

176 **Data analysis**

177 *Phase One*

178 Extracted data were cleaned, edited and initially entered into EpiData version (version 3.1) (EpiData  
179 Association, <http://www.epidata.dk/>). Data were subsequently exported into STATA (version 14)  
180 (College Station, TX, USA) for descriptive analyses that included frequency counts and percent  
181 distributions.



182 *Phase Two*

183 We followed the processes recommended for ensuring rigour qualitative data analysis suggested by  
184 Miles & Huberman (1990). We made audio recordings of all of the interviews and then transcribed each  
185 interview verbatim. In terms of data analysis procedures, we followed four major steps. However, this  
186 was a largely iterative process. The first step involved *data familiarization* through multiple readings of  
187 interview transcripts. The second step entailed *generating a coding framework*. Codes were inductively  
188 generated from the interview transcripts. The developed coding scheme was applied to the interview  
189 transcripts. The third stage was that of *abstracting the coded data into thematic categories* based on the  
190 six ‘building blocks’ of the health system (supplies and medicines, human resources for health, financing,  
191 governance, service delivery and health information systems). The emergent inductive or data-driven  
192 codes were then grouped under six thematic matrices. The fourth and final step was that of  
193 *Interpretation and overall synthesis* [36] which involved all the authors.

194

195 **RESULTS**

196 **Descriptive characteristics**

197 During the twelve months of the study, there were a total of 461225 referrals to Kawempe National  
198 Referral Hospital.

199 ***Mode of delivery***

200 In terms of mode of delivery (cesarean section / spontaneous vaginal delivery), **Table 2** shows that the  
201 mode of delivery was even across most of the age categories at KNRH. However, for the relatively  
202 younger age groups of 15-19 and 20-24, delivery via spontaneous vaginal delivery was significantly

203 higher than through cesarean section. **Figure 3** shows that almost a half of all cesarean deliveries at  
204 Kawempe National Referral Hospital were for mothers between 25 and 35 years of age.  
205

| Age categories                | Mode of Delivery |      |
|-------------------------------|------------------|------|
|                               | C/S              | SVD  |
| Children (<14 Years)          | 8                | 8    |
| Adults (36 - 60 Years)        | 518              | 511  |
| Adolescents (15 - 19 Years)   | 888              | 1214 |
| Young Mothers (20 - 24 Years) | 2948             | 3463 |
| Youths (25 -35 Years)         | 4127             | 4174 |

*Key: C/S: cesarean section, SVD: spontaneous vaginal delivery*

206  
207 **Referrals at KNRH by age group**  
208 **Table 3** shows that more than a half of all referrals to Kawempe National Referral Hospital (KNRH) were  
209 of women between the 25-35 age range. Young mothers (20-24 years) were the second most  
210 represented age group in incoming referrals at KNRH. Adolescents account for more than 8% of all  
211 referrals to KNRH while a total of 224 children (<14 Years) were referred to KNRH as obstetric  
212 emergencies during the period under review.

| Age categories            | <i>n</i> | %    |
|---------------------------|----------|------|
| Children (<14 yrs)        | 224      | 0.05 |
| Adolescents (15 - 19 yrs) | 38444    | 8.33 |

|                             |        |       |
|-----------------------------|--------|-------|
| Young Mothers (20 - 24 yrs) | 142230 | 30.83 |
| Youths (25 -35 yrs)         | 240750 | 52.98 |
| Adults (36 - 60 yrs)        | 39576  | 8.58  |
|                             | 461224 | 100   |

213

#### 214 ***Indications of referrals at KNRH***

215 **Figure 4** shows the ten most common indications for referrals at KNRH between July 2019 and August  
216 2020. The three most cited indications of referral at KNRH are; previous caesarian section scar, followed  
217 by obstructed labour and premature rupture of membranes at term.

218 **Figure 4** also suggests that a number of the top 10 reasons of referrals to KNRH are for conditions which  
219 ordinarily can be managed at Health centre IVs and general hospitals (e.g. hypertension in pregnancy,  
220 pre/eclampsia) which are mandated to offer comprehensive emergency obstetric care and are ideally  
221 staffed with the requisite cadres of health workers for the purpose.

#### 222 **Indications of referral by age group**

223 **Table 3** shows that for adolescents (15-19 year olds) obstructed labor was the most common reason for  
224 referrals to KNRH.

225 Overall, previous caesarian section scar was the leading indication of referral to KNRH across three age  
226 categories; a) young mothers (20-24 year olds), b) youth (25-35 year olds) and c) adults (36-60 year  
227 olds).

228 Obstructed labour was another prominent reason for referrals at KNRH and was consistently so across  
229 all age categories (except for those 14 years or younger).

230

231

232

233

**TABLE 4: MOST REFERRED CONDITIONS BY AGE GROUP**

| Reason for referral               | No. Referred | Children (<14 yrs) (%) | Adolescents (15 - 19 yrs) (%) | Young Mothers (20 - 24 yrs) (%) | Youths (25 -35 yrs) (%) | Adults (36 - 60 yrs) (%) |
|-----------------------------------|--------------|------------------------|-------------------------------|---------------------------------|-------------------------|--------------------------|
| In Labor                          | 209149       | 168(0.1)               | 17817(8.5)                    | 64182(30.7)                     | 108573(51.9)            | 18409(8.8)               |
| Previous Scar                     | 53779        | 0(0)                   | 916(1.7)                      | 12273(22.8)                     | 35229(65.5)             | 5361(10)                 |
| Obstructed Labor                  | 26525        | 0(0)                   | 3469(13.1)                    | 9615(36.3)                      | 11857(44.7)             | 1584(6)                  |
| Premature rupture of membranes    | 15783        | 0(0)                   | 1238(7.8)                     | 5676(36)                        | 7657(48.5)              | 1212(7.7)                |
| Preterm Labor                     | 14437        | 14(0.1)                | 1928(13.4)                    | 5081(35.2)                      | 6384(44.2)              | 1030(7.1)                |
| Malpresentation/Malposition       | 14172        | 0(0)                   | 1134(8)                       | 4412(31.1)                      | 7029(49.6)              | 1597(11.3)               |
| Hypertension in Pregnancy         | 12455        | 0(0)                   | 667(5.4)                      | 3485(28)                        | 6620(53.2)              | 1683(13.5)               |
| CPD (Cephalopelvic Disproportion) | 11855        | 0(0)                   | 2438(20.6)                    | 5221(44)                        | 3812(32.2)              | 384(3.2)                 |
| Pre-eclampsia/Eclampsia           | 11632        | 14(0.1)                | 917(7.9)                      | 3427(29.5)                      | 5863(50.4)              | 1411(12.1)               |
| APH (antepartum hemorrhage)       | 10165        | 14(0.1)                | 604(5.9)                      | 3025(29.8)                      | 5567(54.8)              | 955(9.4)                 |
| Fetal Distress                    | 9006         | 0(0)                   | 975(10.8)                     | 3644(40.5)                      | 4120(45.8)              | 267(3)                   |

234

235

236

237 **Table 4** shows that the three most referred indications at KNRH are; previous cesarean section scar,

238 obstructed labor and rupture of membrane at term. These indications of referral were common across

239 all age groups. The notable exception was with regard to children (<14 Years) seeking care at KNRH for  
 240 whom; pre-term labor, pre-eclampsia and antepartum hemorrhage (APH) were the most frequent  
 241 indications of referral at KNRH.

242 ***Characteristics of referring facilities***

243 Uganda runs a hierarchical referral system with lower-level primary care facilities at the bottom of the  
 244 pyramid which then refer cases to higher-tier facilities at the secondary level of service delivery through  
 245 to tertiary hospitals up the ladder with national referral hospitals at the apex as illustrated in **Figure 1**.

246 **Figure 5** shows that general hospitals (84%) were the leading sources of incoming referrals at KNRH. This  
 247 was followed by health centre IVs (18%). Both general hospitals and Health centre IVs are mandated to  
 248 offer comprehensive emergency obstetric care in the Ugandan health system.

249 In **Table 4** we show the five leading referring facility categories and the most referred indication within  
 250 each of those facilities within category of level of service delivery in the Ugandan health system.

251 Two of the top five referring facilities are at the level of Regional Referral Hospitals (Naguru Hospital and  
 252 Mengo Hospital). Several of the indications of referral to KNRH are ordinarily manageable at the  
 253 Regional Referral hospitals which have obstetrics and gynecology specialists and the requisite  
 254 infrastructure to handle the cases referred to KNRH (such as previous scar).

**Table 4:** Facilities with the most referrals by level of service delivery

| LEVEL                                 | HEALTH FACILITY        | REFERRED CASES (n=) | TOP 3 INDICATIONS FOR REFERRAL | CASES(%) |
|---------------------------------------|------------------------|---------------------|--------------------------------|----------|
| Top 5 Referring HOSPITALS (>30 cases) | Bombo General Hospital | 221                 | Preterm Labour                 | 32(14.5) |
|                                       |                        |                     | Previous Scar                  | 22(10)   |
|                                       |                        |                     | Pre/Eclampsia                  | 12(5.4)  |

|                                    |                                   |      |                                   |            |
|------------------------------------|-----------------------------------|------|-----------------------------------|------------|
|                                    | Naguru Regional Referral Hospital | 57   | Previous Scar                     | 16(28.1)   |
|                                    |                                   |      | Obstructed Labour                 | 10(17.5)   |
|                                    |                                   |      | Malpresentation/Malposition       | 4(7.0)     |
|                                    | Gombe (general) Hospital          | 37   | Fetal Demise                      | 6(16.2)    |
|                                    |                                   |      | Preterm Labour                    | 3(8.1)     |
|                                    |                                   |      | Malpresentation/Malposition       | 3(8.1)     |
|                                    | Mengo Hospital                    | 33   | Previous Scar                     | 3(9.1)     |
|                                    |                                   |      | Pre/Eclampsia                     | 3(9.1)     |
|                                    |                                   |      | Rupture of Membranes              | 3(9.1)     |
|                                    | Kawolo Hospital                   | 32   | Previous Scar                     | 9(28.1)    |
|                                    |                                   |      | Obstructed Labour                 | 6(18.8)    |
|                                    |                                   |      | Hypertension in Pregnancy         | 2(6.3)     |
| Top 5 Referring HC IV (>120 cases) | Kisenyi HC IV                     | 1165 | Previous Scar                     | 146(12.5)  |
|                                    |                                   |      | Hypertension in Pregnancy         | 98(8.4)    |
|                                    |                                   |      | Obstructed Labour                 | 95(8.2)    |
|                                    | Kasangati HC IV                   | 250  | Obstructed Labour                 | 34(13.6)   |
|                                    |                                   |      | Previous Scar                     | 28(11.2)   |
|                                    |                                   |      | CPD (Cephalopelvic Disproportion) | 22(8.8)    |
|                                    | Wakiso HC IV                      | 204  | CPD (Cephalopelvic Disproportion) | 25(12.3)   |
|                                    |                                   |      | Previous Scar                     | 24(11.8)   |
|                                    |                                   |      | Obstructed Labour                 | 23(11.3)   |
|                                    | Mukono HC IV                      | 179  | Previous Scar                     | 23(12.9)   |
|                                    |                                   |      | Preterm Labour                    | 14(7.8)    |
|                                    |                                   |      | Obstructed Labour                 | 13(7.3)    |
|                                    | Mpigi HC IV                       | 132  | Previous Scar                     | 21(15.9)   |
|                                    |                                   |      | Preterm Labour                    | 16(12.1)   |
|                                    |                                   |      | Obstructed Labour                 | 13(9.9)    |
| Top 5 Referring HC III             | Kisugu HC III                     | 8654 | Previous Scar                     | 1048(12.1) |
|                                    |                                   |      | Rupture of Membranes              | 220(2.5)   |

|                                     |                                          |                                   |                                   |          |
|-------------------------------------|------------------------------------------|-----------------------------------|-----------------------------------|----------|
| (>500 cases)                        | Ntenjeru HC III                          | 2387                              | APH (ante partum hemorrhage)      | 164(1.9) |
|                                     |                                          |                                   | Previous Scar                     | 214(9)   |
|                                     |                                          |                                   | Obstructed Labour                 | 151(6.3) |
|                                     |                                          |                                   | Preterm Labour                    | 86(3.6)  |
|                                     | Kawaala Health Centre HC III             | 780                               | Previous Scar                     | 76(9.7)  |
|                                     |                                          |                                   | Obstructed Labour                 | 72(9.2)  |
|                                     |                                          |                                   | Pre/Eclampsia                     | 61(7.8)  |
|                                     | Kitebi Health Centre HC III              | 753                               | Obstructed Labour                 | 80(10.6) |
|                                     |                                          |                                   | Previous Scar                     | 68(9.0)  |
|                                     |                                          |                                   | CPD (Cephalopelvic Disproportion) | 66(8.8)  |
|                                     | Komamboga HC III                         | 533                               | Obstructed Labour                 | 70(13.1) |
|                                     |                                          |                                   | CPD (Cephalopelvic Disproportion) | 39(7.3)  |
| Previous Scar                       |                                          |                                   | 38(7.1)                           |          |
| Top 5 Referring HC II (>10 cases)   | Bbira Ngo HC II                          | 24                                | Obstructed Labour                 | 6(25)    |
|                                     |                                          |                                   | Malpresentation/Malposition       | 2(8.3)   |
|                                     | Namuwongo Tripple N Mertenity Home HC II | 22                                | Obstructed Labour                 | 2(9.1)   |
|                                     |                                          |                                   | Previous Scar                     | 2(9.1)   |
|                                     |                                          |                                   | Rupture of Membranes              | 2(9.1)   |
|                                     | Gombe (Wakiso) HC II                     | 12                                | Pre/Eclampsia                     | 3(25)    |
|                                     |                                          |                                   | Preterm Baby/Prematurity          | 3(25)    |
|                                     | Nakulabye Medical Centre HC II           | 10                                | Obstructed Labour                 | 2(20)    |
| Previous Scar                       |                                          |                                   | 2(20)                             |          |
| Top 3 Referring Clinics (>10 cases) | Kiganda Maternity Clinic                 | 28                                | APH (ante partum hemorrhage)      | 3(10.7)  |
|                                     |                                          |                                   | Preterm Labour                    | 2(7.1)   |
|                                     |                                          |                                   | Hypertension in Pregnancy         | 2(7.1)   |
|                                     | Community Clinic (Kibuli)                | 16                                | Obstructed Labour                 | 5(31.3)  |
|                                     |                                          |                                   | Amniotic Fluid Disorders          | 2(12.5)  |
|                                     |                                          |                                   | Pre/Eclampsia                     | 2(12.5)  |
| Praise God Clinic                   | 13                                       | CPD (Cephalopelvic Disproportion) | 4(30.8)                           |          |
|                                     |                                          | Obstructed Labour                 | 2(15.4)                           |          |

255

256

257 From Table 4 it can be discerned that Previous caesarian section scar was the most common referred  
258 condition across the top referring facilities within the two category of facilities (hospitals and health  
259 centre IVs).

260 Obstructed labour was the second most referred to obstetric emergency in health centre IVs.

261 For the small clinics, the obstetric emergencies referred to KNRH were more diverse compared to  
262 higher-tier hospitals.

### 263 **Geographical distribution of in-coming referrals at KNRH**

264 **Table 4** shows that the majority of referrals to KNRH were from the capital city of Kampala, where the  
265 hospital is based, and the neighboring districts of Wakiso and Mukono.

266 The majority of referrals were from public municipal satellite clinics of Kampala City Authority (KCCA)  
267 (41%) and from the neighboring district of Wakiso (21%). Overall, 61% of all incoming referrals at  
268 Kawempe National Referral, during the period under review, are from only 2 (out of 135) districts of  
269 Uganda.

## 270 **SECTION B: Factors underpinning referrals at lower referring facilities**

### 271 **Human resources for Health**

#### 272 *Deficiencies in skill sets for labour*

273 Interviews with health workers revealed deficiencies in skills sets for labour at the fifteen facilities with  
274 the highest number of referrals at KNRH (**Table 4**). Specific skills gaps were identified by health workers  
275 who highlighted the need for training on monitoring of labour such as the use of the partograph (or

---



276 labour chart) that are required as part of routine maternity services provision and are helpful in  
277 screening for complications in pregnancy. Participants were emphatic in relaying the notion that routine  
278 skills training and refresher courses are sorely needed at lower referring facilities especially around  
279 emergency obstetric care. Management of pregnancy-induced hypertension was frequently mentioned  
280 as an area that needed continuous medical education as many of the referrals at KRNH were with regard  
281 to hypertension in pregnancy that stemmed from poor management in the earlier trimesters of  
282 pregnancy such as high-risk expectant mothers not being given anti-hypertension medication. The  
283 monitoring of vital signs in expectant mothers was also flagged as a weak area in the fifteen facilities  
284 with the highest referrals.

#### 285 *Shortages of physicians*

286 Rural-based sub-district facilities reported shortages of physicians to conduct surgical procedures even  
287 in cases where theaters were available. Although sub-district facilities are mandated to have physician  
288 cadre on their staff (**Figure 2**), seven of the facilities we visited reported that they did not have a  
289 physician on the ground to handle complications in pregnancy or cases such as managing women with  
290 previous scars. The shortage of skilled health workers compelled lower referring facilities to recommend  
291 referrals even for basic procedures on account of shortage of medical doctors.

292 *'You find the whole of the maternity section of Mbarara Regional Referral Hospital is as congested as a*  
293 *village market. Do you know why? Because doctors at sub-district health centres are not on the ground.*  
294 *The theaters are closed. So you get so many referrals at regional referral hospitals even for things like a*  
295 *cesarean section because doctors are not operating at lower level facilities' [Facility in-charge, Health*  
296 *Centre IV, Western Uganda, Female]*

297 A related challenge was the common phenomenon of many of the health workers not being on the  
298 ground on account for being on official and non-official study leaves especially those with the requisite  
299 skills such as Clinical Officers and physicians especially at rural work stations. Hence, although many of  
300 the facilities had health workers with the requisite skills on their staff, many were actually not on the  
301 ground.

302 *'You find that at a Health Centre IV there are supposed to be two staff, a senior medical officer and a*  
303 *medical officer. Now, if one of them goes on study leave to do a Master of Public Health, the remaining*  
304 *one cannot attend to all the patients in a whole sub-district and the same time do cesarean sections'*  
305 *[Facility in-charge, Health Centre IV, central Uganda, female]*

#### 306 **Maternal care commodity shortages**

307 A common refrain across the facilities we visited was the shortage of basic commodities needed in  
308 routine maternal care. In Western Uganda, health workers reported that they had not been supplied  
309 with commodities from National Medical Stores (NMS), the national medicines supplier for the past  
310 three months. Radiology supplies were frequently mentioned as out of stock and yet these are key in  
311 diagnosing pregnancies with complications. In such situations, health workers reported that facilities  
312 that include general hospitals were compelled to refer expectant mothers to tertiary hospitals which  
313 were perceived as better resourced. Basic commodities used in labour such as gloves and syringes were  
314 reported to be out of stock in several facilities we visited.

315 *'We have not received supplies from National Medical Stores in the last three months. Even when they*  
316 *come, the supplies they give us last a month, instead of two months. So, it means I am always in a*  
317 *constant short fall of drugs I need to serve the number of patients we serve here. The supplies we get is*  
318 *only 50% of what I feel is required'. [Hospital Superintendent, general hospital, Northern Uganda, male].*

319 A related constraint reported across multiple facilities was that of shortage of basic equipment needed  
320 in maternal care. The frequently mentioned items include basic items such as delivery beds, oxygen  
321 concentrators, anesthetic machines, emergency drug trollies and bulb syringes.

322 The physical state of theaters at primary care facilities was said to be in poor shape and not amenable to  
323 conducting obstetric procedures even when the requisite personnel (such as physician cadres) were  
324 available. As such, referrals were frequently made higher up the maternity care cascade due to the state  
325 of disrepair of theatres at sub-district level in Uganda.

## 326 **Financing**

### 327 *Insufficient operational grants to facilities*

328 Facility in-charges reported that quarterly funding releases from the central government to public  
329 facilities for routine operational expenses dubbed ‘primary health care’ or PHC grants were woefully  
330 inadequate to cater for all operational expenses that include repair of basic equipment needed in  
331 maternity services such as theaters. A large district hospital in Western Uganda reported that their  
332 quarterly release for all hospital expenses (including medical equipment) was as little as 40 million  
333 Uganda shillings (\$ 6,250). This was in spite of the fact that district hospitals attend to hundreds of  
334 patients and burgeoning clients from neighboring districts. In these cash-strapped circumstances,  
335 facilities were frequently unable to maintain physical infrastructure and equipment for routine maternal  
336 care and opted to refer patients to the tertiary level of care even when this was not clinically warranted.

337 *‘There is severe under funding. The money we are given as a general hospital is for recurrent expenditure*  
338 *for things like electricity and water, there is nothing for equipment such as X-ray, ultra sound and*  
339 *anesthetic machines. We do not receive any single coin to construct even a toilet! So, how can I buy*  
340 *expensive equipment to refurbish the theatre for cesarean sections? I admit over 500 mothers in*

---

341 *maternity every month. There is a cost to every operation of a pregnant mother in terms of gloves, in*  
342 *terms of drugs, disposable gloves, surgical blades, gauze, cotton but I don't have money for that. All I*  
343 *have to do is refer the cases which need surgeries' [Hospital superintendent, General Hospital, Western*  
344 *Uganda, male]*

#### 345 **Gaps in maternity records data sharing**

346 *Paucity of records on in-coming referrals*

347 Participants across the health facilities we visited frequently mentioned that information sharing  
348 between lower referring facilities and facilities receiving in-coming referrals up the higher-tier of the  
349 referral ladder was a fundamentally weak (**Figure 2**). At Kawempe National Referral Hospital it was  
350 common to find that patients were received with insufficient background information on indications of  
351 referrals and their previous management by lower referring facilities. Uganda runs a health information  
352 system (HMIS) incorporating routinely collected data on maternity services however documentation by  
353 attending health workers across the cascade was reportedly weak which contributed to low data  
354 utilization by referral facilities.

355 The phenomenon of self-referrals or 'patient-walk-ins' was said to be common across the obstetric  
356 referral chain in Uganda which further compounded the challenge of paucity of data on in-coming  
357 patients at especially the tertiary level of care. Participants acknowledged that the failure by higher-tier  
358 hospitals to insist on minimum referral requirements before accepting in-coming referrals such as  
359 having basic information on patients' previous management history from the lower referring facility  
360 encouraged the widespread practice of bypassing the established maternity services referral chain in  
361 Uganda by both providers and patients.

362 It emerged that there were no mechanisms for providing feedback to lower referring facilities to enable  
363 them learn from the events (such as in strengthening skills in partograph use) which perpetuates non-  
364 adherence to the referral chain in Uganda and contributes to accumulating unnecessary burdens at the  
365 highest level of maternal care.

## 366 **Governance**

### 367 *Weaknesses in referral linkages*

368 Our study unearthed gaps in maternity services referral linkages between Regional Referral Hospitals  
369 (RRHs) and general Hospitals (**Figure 2**). Although RRHs are mandated to provide supervisory oversight  
370 over general hospitals in the regions under their purview, participants at district hospitals conceded  
371 there was a disconnect between the two. It emerged that RRHs frequently don't perform their  
372 supervisory function at general hospitals.

### 373 *Limited support supervisions*

374 On-site supervisions of maternity services at general hospitals by RRHs was said to be dysfunctional. The  
375 two levels of care were said to operate independently of each other, in practice, despite the elaborate  
376 referral relationships described in written policies and guidelines. This disconnect created an  
377 environment where referrals from lower referring facilities to higher-tier hospitals were not rationalized  
378 and did not meet the laid down referral criteria and procedures.

379 *'Our regional supervisors are supposed to be Regional Referral hospitals but somehow we do not connect*  
380 *in routine operations. The Regional Referral Hospital are supposed to do support supervision in maternity*  
381 *services delivery for lower health facilities but a for a whole year you will never see any person from*  
382 *there come here' [Hospital superintendent, general hospital, Eastern Uganda, female].*

383

## 384 **DISCUSSION**

385 A fully functional referral system is central to achieving quality maternal and newborn care in Sub-  
386 Saharan Africa [1]. We set out to understand the appropriateness of referrals made to Kawempe  
387 National Referral Hospital in Uganda and the factors underpinning referrals decision making at 75 lower  
388 referring facilities across Uganda. We reviewed data of maternal and perinatal admissions between July  
389 2019 and August 2020. We found that previous cesarean section scar was the most referred condition at  
390 KNRH. Obstructed labour and rupture of membrane at term were the other two most commonly  
391 referred conditions at Kawempe National Referral Hospital during the period under review.

392 Overall, our findings suggest that the ten most common incoming referrals at KNRH stem from initial  
393 poor handling of labour conditions at referring lower-level health facilities. These data point to possible  
394 deficiencies in basic clinical skills in labour and its management by attending health workers from the  
395 primary to the tertiary level of service delivery as well under-resourced health systems and challenging  
396 operational contexts at lower-level referring facilities such as the adequacy of the physical infrastructure  
397 underpinning maternal care. A study in Ghana by Afari and colleagues [24] found that deficiencies in  
398 clinical skills in the management of labour were one of the top four groups of factors impeding maternal  
399 care in Ghana. Previous studies have implicated health worker skills in maternal care at primary care  
400 facilities [1]- [5].

401 In this study we found that previous caesarean section scar, premature rupture of membrane and  
402 obstructed labor were three leading reasons for referrals at KNRH. A study by Ghardallou and  
403 colleagues [20] found that premature rupture of membrane was the second most referred obstetric  
404 condition at a tertiary university hospital in Tunisia. Hueston and colleagues [21] found that early

405 obstetric referrals were most likely among women who delivered by cesarean section in a study that  
406 pooled data from five states in the United States.

407 On the whole, our findings suggest that the obstetric care referral system in Uganda is not functioning as  
408 intended from the vantage point of the national specialized hospital. More specifically, the majority of  
409 the conditions referred to Kawempe National Referral Hospital (such as mothers with previous scars,  
410 hypertension in pregnancy) are ordinarily manageable at sub-district level or by district hospitals which  
411 have the requisite cadres of health workers (such as physicians and even obstetrics and gynecology  
412 specialists, in the latter case) with the competence to effectively manage the referred conditions.

413  
414 Phase Two of our study implicated health system factors in the non- adherence of referral guidelines at  
415 lower referring facilities due to the underpinning operational context such as the shortage of basic  
416 commodities for maternal care (such as radiology supplies), severe under funding culminating in sub-  
417 optimal physical infrastructure (e.g. poorly equipped theatres) and maternity workforce constraints such  
418 as absenteeism. In addition, we found weak referral linkages and communication gaps between lower  
419 referring facilities and receiving facilities at the apex of the referral chain in Uganda. Dysfunctional  
420 governance regimes where tertiary-level facilities hardly conduct on-site supervision of lower-level  
421 facilities in maternity care were identified as contributory factors to the non-adherence to the  
422 hierarchical referral system in Uganda (**Figure 2**). Mbonye and colleagues [8] found that critical staffing  
423 gaps at lower-level facilities in Uganda hamper the observance of maternity referral guidelines. In  
424 another study from Uganda, Mubiru and colleagues [23] report that women frequently bypass the  
425 established obstetric referral chain and that this happens 40-70% of the time. A scoping review found  
426 that maternity workforce constraints at the primary care level in developing countries impede  
427 adherence to established maternity referral systems [22]. This same scoping review notes that

428 deficiencies in basic communication, the paucity of feedback mechanisms between referrer and receiver  
429 were common in maternity referral systems in the developing world.

430 Together, our findings suggest that KNRH is inundated with ‘normal’ cases that are ideally manageable  
431 by less specialized cadres and providers and as such, the national referral hospital is bereft of the  
432 occupational experience of managing more specialized cases and its specialists are not being optimally  
433 utilized in handling more deserving referrals.

434 Additionally, the volume of referrals at KNRH which were close to a half a million cases during the  
435 period under review, are overwhelming for a single facility. The quality of care at KNRH given the patient  
436 load handled and health worker workloads are major points of concern.

437 In terms of the geographic distribution of incoming referrals, we found that the majority of referrals to  
438 Kawempe National Referral Hospital were dominated by peripheral facilities to KNRH from within the  
439 Ugandan capital city of Kampala and from three principal neighbouring districts in central Uganda  
440 (Wakiso, Mukono and Mpigi). Our data suggests that the profile of incoming referrals at KNRH do not  
441 reflect diversity in the geographical sub-regions of Uganda as would be expected of a well-functioning  
442 national referral system. On a programming note, these data point to the importance of devising  
443 capacity building interventions for facilities persistently referring to KNRH such as tailoring remedial  
444 training of health workers in skills gaps revealed by the nature of incoming referrals (such as the need  
445 for refresher EMOnC and partograph trainings). In addition, there is need to develop a robust feedback  
446 mechanism to lower referring facilities in maternal care service provision such as in the proper  
447 management of cesarean sections which is the leading source of incoming referrals and in general,  
448 emergency obstetric management. Mentorship and support supervision of lower referring facilities in  
449 the provision of maternal care services in Uganda such as help in diagnosing complications in pregnancy  
450 is recommended.

---



451 Our study suggests a need for strengthening documentation of routine maternal and newborn care at  
452 the primary care and secondary level of service delivery in Uganda to support their appropriate  
453 management at the pinnacle of the national referral system which needs these referral data. This may  
454 call for a review of the health information systems (HMIS) in as far as it is supportive of a high quality of  
455 maternal and newborn services along the maternal care cascade.

456 In this study we found that there were a number of adolescent and child mothers among the incoming  
457 referrals to KNRH and that obstructed labour was the leading indication of referral for this group of  
458 mothers. Previous studies have highlighted teenage pregnancy as a risk factor for obstructed labor and  
459 related complications of early pregnancy [25]- [28]. With over 224 child mothers (<14 years) referred to  
460 KNRH over a period of 12 months, our findings suggest that early pregnancies could be common in  
461 Uganda and we call for policy and programming interventions aimed at reducing the burden of teenage  
462 pregnancies in Uganda and the broader region of sub-Saharan Africa [29]- [33].

463

464

465

466

467

## 468 REFERENCES

- 469 1. Boldosser-Boesch A, Brun M, Carvajal L, Chou D, de Bernis L, Fogg K, Hill K, Jolivet R, McCallon B,  
470 Moran A, Say L. Setting maternal mortality targets for the SDGs. *The Lancet*. 2017 Feb  
471 18;389(10070):696-7.
- 472 2. Callister LC, Edwards JE. Sustainable development goals and the ongoing process of reducing  
473 maternal mortality. *Journal of Obstetric, Gynecologic & Neonatal Nursing*. 2017 May  
474 1;46(3):e56-64.
- 475 3. Musarandega R, Machekano R, Munjanja SP, Pattinson R. Methods used to measure maternal  
476 mortality in Sub-Saharan Africa from 1980 to 2020: A systematic literature review. *International  
477 journal of gynaecology and obstetrics: the official organ of the International Federation of  
478 Gynaecology and Obstetrics*. 2021 Apr 3.

- 479 4. Orjingere O, Morgan J. Effectiveness of community based interventions in reducing maternal  
480 mortality in sub-Saharan Africa: a systematic review. *International Journal of TROPICAL DISEASE*  
481 *& Health (IJTDH)*. 2020 Jul 20;41(9):9-21.
- 482 5. Van Lerberghe W, Matthews Z, Achadi E, Ancona C, Campbell J, Channon A, De Bernis L, De  
483 Brouwere V, Fauveau V, Fogstad H, Koblinsky M. Country experience with strengthening of  
484 health systems and deployment of midwives in countries with high maternal mortality. *The*  
485 *Lancet*. 2014 Sep 27;384(9949):1215-25.
- 486 6. Odekunle FF. Maternal mortality burden: The influence of socio-cultural factors. *International*  
487 *Journal of Health Sciences and Research*. 2016;6(12):316-24.
- 488 7. Bwana VM, Rumisha SF, Mremi IR, Lyimo EP, Mboera LE. Patterns and causes of hospital  
489 maternal mortality in Tanzania: A 10-year retrospective analysis. *PLoS One*. 2019 Apr  
490 9;14(4):e0214807.
- 491 8. Mbonye AK, Asimwe JB, Kabarangira J, Nanda G, Orinda V. Emergency obstetric care as the  
492 priority intervention to reduce maternal mortality in Uganda. *International Journal of*  
493 *Gynecology & Obstetrics*. 2007 Mar 1;96(3):220-5.
- 494 9. Majoko F, Nyström L, Munjanja SP, Lindmark G. Effectiveness of referral system for antenatal  
495 and intra-partum problems in Gutu district, Zimbabwe. *Journal of obstetrics and gynaecology*.  
496 2005 Jan 1;25(7):656-61.
- 497 10. Murray SF, Pearson SC. Maternity referral systems in developing countries: current knowledge  
498 and future research needs. *Social science & medicine*. 2006 May 1;62(9):2205-15.
- 499 11. Koblinsky M, Moyer CA, Calvert C, Campbell J, Campbell OM, Feigl AB, Graham WJ, Hatt L,  
500 Hodgins S, Matthews Z, McDougall L. Quality maternity care for every woman, everywhere: a  
501 call to action. *The Lancet*. 2016 Nov 5;388(10057):2307-20.
- 502 12. Melese T, Gebrehiwot Y, Bisetegnè D, Habte D. Assessment of client satisfaction in labor and  
503 delivery services at a maternity referral hospital in Ethiopia. *The Pan African medical journal*.  
504 2014;17.
- 505 13. Mufenda J, Gebhardt S, Van Rooyen R, Theron G. Introducing a mobile-connected umbilical  
506 doppler device (UmbiFlow™) into a primary care maternity setting: does this reduce  
507 unnecessary referrals to specialised care? results of a pilot study in Kraaifontein, South Africa.  
508 *PLoS One*. 2015 Nov 23;10(11):e0142743.
- 509 14. Hussein J, Kanguru L, Astin M, Munjanja S. What kinds of policy and programme interventions  
510 contribute to reductions in maternal mortality? The effectiveness of primary level referral  
511 systems for emergency maternity care in developing countries. Social Science Research Unit,  
512 Institute of Education, University of London. 2011 Jun.
- 513 15. Busumani W, Mundagowa PT. Outcomes of pregnancy-related referrals from rural health  
514 facilities to two central hospitals in Harare, Zimbabwe: a prospective descriptive study. *BMC*  
515 *Health Services Research*. 2021 Dec;21(1):1-1.
- 516 16. Hussein J, Kanguru L, Astin M, Munjanja S. The effectiveness of emergency obstetric referral  
517 interventions in developing country settings: a systematic review. *PLoS medicine*. 2012 Jul  
518 10;9(7):e1001264.
- 519 17. Musiimenta A, Tumuhimbise W, Pinkwart N, Katusiime J, Mugenyi G, Atukunda EC. A mobile  
520 phone-based multimedia intervention to support maternal health is acceptable and feasible  
521 among illiterate pregnant women in Uganda: Qualitative findings from a pilot randomized  
522 controlled trial. *Digital Health*. 2021 Feb;7:2055207620986296.
- 523 18. Ivankova NV, Creswell JW, Stick SL. Using mixed-methods sequential explanatory design: From  
524 theory to practice. *Field methods*. 2006 Feb;18(1):3-20.

- 525 19. Byakwaga E, Sekikubo M, Nakimuli A. Level of and factors associated with awareness of  
526 gestational diabetes mellitus among pregnant women attending antenatal care at Kawempe  
527 National Referral Hospital: a cross sectional study. *BMC pregnancy and childbirth*. 2021  
528 Dec;21(1):1-8.
- 529 20. Ghardallou M, Limam M, Khelifi A, Khairi O, Khairi H, Mtiraoui A, NabliAjmi T. Obstetric referrals  
530 to a tertiary care maternity: a descriptive study. *The Pan African Medical Journal*. 2019;33.
- 531 21. Hueston WJ. Obstetric referral in family practice. *Journal of family practice*. 1994 Apr  
532 1;38(4):368-73.
- 533 22. Murray SF, Pearson SC. Maternity referral systems in developing countries: current knowledge  
534 and future research needs. *Social science & medicine*. 2006 May 1;62(9):2205-15.
- 535 23. Mubiri P, Kajjo D, Okuga M, Marchant T, Peterson S, Waiswa P, Hanson C. Bypassing or  
536 successful referral? A population-based study of reasons why women travel far for childbirth in  
537 Eastern Uganda. *BMC Pregnancy and Childbirth*. 2020 Dec;20(1):1-0.
- 538 24. Afari H, Hirschhorn LR, Michaelis A, Barker P, Sodzi-Tetty S. Quality improvement in emergency  
539 obstetric referrals: qualitative study of provider perspectives in Assin North district, Ghana. *BMJ  
540 open*. 2014 May 1;4(5):e005052.
- 541 25. Shaikh S, Shaikh AH, Shaikh SA, Isran B. Frequency of obstructed labor in teenage pregnancy.  
542 *Nepal Journal of Obstetrics and Gynaecology*. 2012;7(1):37-40.
- 543 26. Adeyinka DA, Oladimeji O, Adekanbi TI, Adeyinka FE, Falope Y, Aimakhu C. Outcome of  
544 adolescent pregnancies in southwestern Nigeria: a case-control study. *The Journal of Maternal-  
545 Fetal & Neonatal Medicine*. 2010 Aug 1;23(8):785-9.
- 546 27. Creatsas G, Elsheikh A. Adolescent pregnancy and its consequences. *The European Journal of  
547 Contraception & Reproductive Health Care*. 2002 Jan 1;7(3):167-72.
- 548 28. Omar K, Hasim S, Muhammad NA, Jaffar A, Hashim SM, Siraj HH. Adolescent pregnancy  
549 outcomes and risk factors in Malaysia. *International Journal of Gynecology & Obstetrics*. 2010  
550 Dec 1;111(3):220-3.
- 551 29. Gideon R. Factors associated with adolescent pregnancy and fertility in Uganda: analysis of the  
552 2011 demographic and health survey data. *American Journal of Sociological Research*.  
553 2013;3(2):30-5.
- 554 30. Okonofua F. Prevention of child marriage and teenage pregnancy in Africa: need for more  
555 research and innovation Il faut encore plus de recherche et d'innovation dans la prévention de la  
556 grossesse chez les enfants et les adolescentes dans les mariages africains. *African journal of  
557 reproductive health*. 2013 Jan 1;17(4):9-13.
- 558 31. Daniels JP. Tackling teenage pregnancy in Colombia. *The Lancet*. 2015 Apr 18;385(9977):1495-6.
- 559 32. Holness N. A global perspective on adolescent pregnancy. *International journal of nursing  
560 practice*. 2015 Oct;21(5):677-81.
- 561 33. Kulin HE. Adolescent pregnancy in Africa: a programmatic focus. *Social Science & Medicine*.  
562 1988 Jan 1;26(7):727-35.

563  
564

565

566

567

568

569

570

571

572

573

574

575

576

577

578

579

580

581

582

583

584

585

586

587

588

589
